# Parental Expectation of Side Effects Following Vaccination Is Self-fulfilling: A Prospective Cohort Study

Louise E Smith, MSc<sup>1,2</sup> • John Weinman, PhD<sup>1</sup> • Richard Amlôt, PhD<sup>2</sup> • Jenny Yiend, PhD<sup>1</sup> • G James Rubin PhD<sup>1</sup>

Published online: 2 June 2018

© Society of Behavioral Medicine 2018. All rights reserved. For permissions, please e-mail: journals.permissions@oup.com.

## Abstract

**Background** One of the major factors contributing to parental refusal of vaccinations is the perception that vaccines cause side effects. Although symptoms are commonly reported following vaccinations, their causes are not always straightforward. Although some may be directly attributable to the vaccine itself, others may reflect pre-existing or coincidental symptoms that are misattributed to the vaccine.

**Purpose** To investigate psychological factors associated with parental report of side effects following vaccination with the child influenza vaccine, and parental intention to re-vaccinate one's child the following year.

**Methods** A prospective cohort study was run in primary care practices in London in the 2016–2017 influenza season (ClinicalTrials.gov number NCT02909855). Two hundred seventy parents from 14 practices completed a questionnaire before their child's vaccination. Follow-up questionnaires were completed 3 days after vaccination and one month after vaccination. Parental report of side effects and vaccination intention for the subsequent year were measured.

**Results** Parental report of side effects was strongly associated with pre-vaccination expectation of side effects. Suggestions received from the media, National Health Service (NHS) vaccination leaflet, and health

care workers, as well as uncertainty-related beliefs, perceived sensitivity of the child to medicines, pessimism, and anxiety were also associated with reporting side effects. Side effect report was associated with lower vaccination intention for the following influenza season.

**Conclusions** Side effect perception following vaccination is influenced by psychological factors, in particular expectations. Perceiving side effects reduces future vaccination intention. Future public health communications should aim to decrease unrealistic expectations of side effects to increase vaccine uptake.

**Keywords** Influenza • Child vaccination • Attitudes • Symptom • Psychological factors

## Introduction

In England, routine vaccination of children for influenza began in 2013 [1]. Although the vaccine is provided for free, uptake remains low, with vaccination targets of 40% in 2- to 4-year-olds set by Public Health England not being reached in the 2015–2016 and 2016–2017 influenza seasons [2, 3]. There has been much research conducted on factors associated with vaccine uptake, with a number of systematic reviews consistently finding the perception that the vaccine causes side effects to be associated with vaccination refusal [4–7].

Although side effects from the influenza vaccine are mostly mild in nature and short term [8], research by our group indicates that parents who perceived side effects in their child following vaccination for influenza in the 2015–2016 season were less likely to intend to re-vaccinate their child the following year [9]. This issue is

✉ Louise E Smith  
louise.7.smith@kcl.ac.uk

<sup>1</sup> King's College London, Institute of Psychiatry, Psychology and Neuroscience, London, UK

<sup>2</sup> Public Health England, Emergency Response Department of Science and Technology, Porton Down, UK

particularly problematic for the child influenza vaccine as clinical trial data indicate that 47.9% of children will experience side effects following vaccination [8], yet children need to be re-vaccinated each year.

To date, there has been little research exploring the factors that contribute to parental perception of side effects in one's child. Understanding what determines whether parents perceive symptoms in their child has implications not just for our understanding of how their attitudes toward vaccinations develop, but also for our understanding of treatment decisions made on behalf of the child more generally [10] and on the burden to health care services if parents overestimate the presence or severity of a symptom [9, 11].

Research has identified associations between a number of psychological factors and symptom perception in oneself. One study, investigating the incidence of side effects following travel vaccinations, found that adults who were already symptomatic at the time of vaccination reported more symptoms following vaccination [12]. Symptom perception in oneself has also been associated with perceived sensitivity to medicines (PSM) [12, 13], modern health worries [14–19], and personality traits such as anxiety [20] and negative affect [12, 21, 22]. Increases in symptom reports have been shown following news coverage about the side effects of a medication [23] and following observation of symptoms in others [24], something which may be more apparent in females than in males [24, 25]. Negative beliefs about medicines are associated with higher expectations of side effects [26] and misattribution of nonspecific symptoms to medications [27]. For some of these factors, the potential for a vicious circle exists. For example, if PSM facilitates the development of symptoms after a medicine is taken, this may reinforce a patient's view of themselves as sensitive.

In contrast to what we know about perception of symptoms in oneself, limited, mainly poor quality research exists investigating parental perception of symptoms in one's child. Studies suggest that some factors associated with symptom perception in the self may also be implicated in parental perception of symptoms. For example, parental symptom perception has been associated with an expectation for medication to cause side effects [28, 29], and social observation of symptoms in others [9]. General attitudes, such as being concerned about the safety of a vaccine and not liking vaccinations for the child have also been associated with parental symptom perception [9, 30]. Parents are more likely to perceive symptoms in their child if the child has a history of symptoms, or is currently experiencing nonspecific symptoms [31–37], or if the child has a chronic health problem [9, 35, 38–41]. Parents with increased anxiety report more symptoms in their child [32–34, 42]. However, almost all research investigating factors

associated with the perception of symptoms in the child is cross-sectional, limiting our ability to infer causality.

Although parents may perceive side effects in their child immediately following their influenza vaccination [43], their decision to re-vaccinate their child occurs 1 year later. Recall of symptoms is often inaccurate, and may be influenced by different factors to immediate perception, including expectation, previous experiences, and symptom severity [44].

In this study, we sought to (a) assess whether pre-vaccination symptoms, parental expectation, previous history of symptoms following vaccination, parental psychological traits, parental perceptions about medicines and other technologies, attitudes toward influenza and the vaccine, and personal and clinical characteristics are associated with parental report of side effects following child influenza vaccination both immediately after and 1 month after vaccination; (b) identify whether the influence of significant predictors on perception of side effects is mediated by parental expectations; and (c) assess whether perception of a side effect, worry about and perceived severity of side effects, suggestion of side effects from a health care worker, and change in the child's PSM are associated with vaccination intention for the following influenza season. We also hypothesized that perception of side effects might affect parental perception of their child's sensitivity to medicines.

## Methods

### Design

Participants in this prospective cohort study completed questionnaires before their child received the influenza vaccine for the 2016–2017 influenza season (T1), 3 days after their vaccination (perception, T2), and 1 month after their vaccination (recall, T3).

### Sample Size Calculation

We based our sample size calculation on the ability to detect a small odds ratio of 1.6 [45] for symptom perception between parents with high and low expectation of symptoms. Clinical trial data suggest that 47.9% of children who received the Fluenz tetra vaccine report a symptom [46]. Survey data by our group suggested that we could assume equal sample sizes between those who do and do not expect symptoms [47]. To detect this difference as significant at the 5% level with 85% power requires a total sample size of 180. We therefore aimed to recruit 300 people at T1, to allow for a 40% attrition rate.

## Participants and Recruitment

Participants were eligible for the study if they had a child aged 2–4 on August 31, 2016, were 18 years or over, and spoke fluent English.

Potential participants were identified by 11 primary care practices in South London and were sent letters informing them about the study. Parents were then approached upon arrival at the practice for their child's influenza vaccination by L.E.S. or a research nurse. Additional participants from other practices participated online.

## Study Materials

Full study materials can be found in the [Supplementary Material](#).

## Outcome Measures

We asked parents at T2 and T3 if they thought their child had “experienced any of the following side effects because of their latest child flu vaccine.” For our list of side effects, we used an adapted parent report form of the patient health questionnaire [48], to which were added potential side effects of the vaccine listed in the patient information leaflet [46] and a more general non-specific symptom (the child being “not themselves”) that was recommended when the materials were piloted with 11 parents. This symptom list has been used in a previous nationally representative study by our group [9].

Intention to vaccinate in the 2017–2018 influenza season was measured at T2 and T3 by two items adapted from Payaprom et al. [49] (“I *want* [child] to be vaccinated for flu next year” and “I *intend* [child] to be vaccinated for flu next year”) which were rated on a five-point Likert scale from “strongly disagree” to “strongly agree.”

## Symptoms Before Vaccination

A child's existing symptoms at the time of vaccination were measured by asking parents if their child had “shown signs of any of the following symptoms in the last 24 hours.” The list of symptoms provided was the same as that used in our outcome measure.

## Expectation

A direct measure of expectation asked parents how likely it was that their child would “get short-term side effects from the flu vaccine” on a five-point Likert scale of “very unlikely” to “very likely.” Parents were also asked how likely five different sources (friends and family, official websites and departments, the media, the NHS influenza vaccination leaflet, and the health care worker) had said

side effects were from the vaccine, and their trust in these sources of information. Parents were also asked whether they knew “any children who have experienced side effects from the flu vaccine.” All expectation questions were asked at T1 apart from those relating to the suggestion of side effects from the health care worker as these could not be asked until after the vaccination appointment had taken place, at T2.

## Symptoms Following Previous Vaccinations

At T1, parents were asked if the child had “ever had side effects” from previous influenza vaccinations and other routine vaccinations. Parents who indicated their child had experienced side effects from previous influenza vaccinations were asked how severe the side effects were and how worried they had been. Parents who indicated their child had experienced side effects from other routine childhood vaccinations were asked how worried they had been.

## Psychological Traits

Participants completed four personality measures at T2. Participants' trait anxiety was measured by the short form of the State-Trait Anxiety Inventory (STAI-T) [50]. Trait affect was measured using the short form Positive and Negative Affect Schedule (PANAS) [51]. Participants' neuroticism was measured using the neuroticism items from an abbreviated form of the Eysenck Personality Questionnaire–Revised (EPQR-A) [52]. Optimism and pessimism were measured using the revised Life Orientation Test (LOT-R) [53].

## Perceptions About Other Medicines and Technologies

Participants' perception of their child's sensitivity to medicines was measured at both T1 and T3 using an adapted parental report version of the Perceived Sensitivity to Medicines Questionnaire (PSM) [13].

The Modern Health Worries Questionnaire (MHW) [54] and the Beliefs About Medicines Questionnaire, general section (BMQ-G) [55] were both completed at T2.

## Attitudes Toward Influenza and the Vaccine

Attitudes toward influenza and the child influenza vaccine were measured at T1 by a series of 15 statements used in a previous study by our group [9]. Parents were also asked how much it would affect their daily life if their child were to catch influenza.

## Personal and Clinical Characteristics

Participants were asked for their age and gender. Personal characteristics relating to the index child included age,

gender, and whether they were the parent's first child. Clinical characteristics, such as whether the parent or child had a long-term health condition and whether there were any people "at risk" for influenza in the child's household were also asked. Participants were asked whether the child was up-to-date on other routine vaccines.

## Procedure

Ethical approval for the study was granted by the NHS Research Ethics Committee (reference: IRAS ID: 192325, REC reference: 16/LO/1003).

Participants were recruited into the study between October 1 and December 16, 2016. Before completing T1 materials, consent was obtained from all parents following standard practice from our research ethics committee.

Parents completed T1 materials in the waiting room at the primary care practice immediately before their child's vaccination appointment, or online before their child's vaccination appointment. One item in T1, asking whether the child had experienced any symptoms in the past 24 hr, was excluded from the online version; participants were contacted on the day of their child's vaccination appointment to answer this.

Three days after the vaccination appointment, parents were contacted via email with a link to T2 materials, which were available online. One month after the vaccination appointment, parents were emailed a link to T3 task materials. If participants did not have access to email, T2 and T3 materials were completed by telephone.

## Protocol Registration

The protocol for the study was registered in advance on clinicaltrials.gov (identifier: NCT02909855).

## Data Analysis

### *Predictors of side effect report*

We recoded report of a symptom at T2 or T3 and in the 24 hr before vaccination into binary variables (reported at least one symptom vs. no symptoms reported).

We recoded data where parents indicated that they had not received information from a particular source as missing. A composite measure of symptom suggestion from each information source was created by multiplying the suggestion of side effects from that source by the participant's trust in that source. We treated knowing another child who had experienced side effects following vaccination for influenza as a binary variable (yes, no). General attitude questions were recoded to binary variables (agree, disagree); as with previous research using these items, we treated "neither agree nor disagree" as missing data.

Separate logistic regressions were used to determine whether pre-existing symptoms, expectation for the child to develop side effects, previous experience of side effects, personality traits, perceptions, attitudes, and personal and clinical characteristics predicted perception of side effects at T2 and T3.

### *Expectations as a mediating variable*

Zero-order correlations were run to identify factors that were correlated with direct expectations of the child developing side effects and side effect report at T2 and T3. Factors that were correlated with both direct expectations and side effect report at either T2 or T3 were entered into mediation analyses using the method described in Mackinnon [56]. Mediation using standardized coefficients was run to see whether the report of side effects was mediated by expectation. Ninety-five percent confidence intervals were computed using bootstrapping (2,000 repetitions) and were bias-corrected. Personal and clinical characteristics were entered into the model as covariates.

### *Predictors of vaccination intention*

Answers to vaccination intention questions were dichotomized, with participants coded as "definitely intending" to vaccinate their child (answered "agree" or "strongly agree" to both questions) or "not definitely intending" to vaccinate (answered "neither agree nor disagree," "disagree," or "strongly disagree" to one or both questions). We then used intention at both T2 and T3 to create a single overall intention score. Where participants only completed one follow-up questionnaire, we used the data available to us to classify their response as either "definitely intend" or "do not definitely intend" to vaccinate. Where participants completed both T2 and T3 and had concordant intentions, we classified them as either "definitely intend" or "do not definitely intend" as appropriate. If conflicting intentions were given at T2 and T3, we classified participants as "do not definitely intend."

We computed the difference between PSM at T3 and T1 by subtracting T1 scores from T3.

Logistic regression analyses were used to identify whether report of a side effect at T2 or T3, worry about and perceived severity of these side effects, suggestion that the child would experience side effects by a health care worker, and change in the child's PSM predicted intention to re-vaccinate the child in the next influenza season.

### *Predictors of change in perceived sensitivity*

We used linear regression analyses to identify whether reporting side effects at T2 or T3 was associated with an increase in PSM. For these analyses, PSM at T1 was controlled for [57].

**Table 1** Participants' personal characteristics and associations with side effect reporting

| Participant characteristics                  | Level         | Side effects recalled at T2    |                                 |                                           | Side effects recalled at T3    |                                 |                                           |
|----------------------------------------------|---------------|--------------------------------|---------------------------------|-------------------------------------------|--------------------------------|---------------------------------|-------------------------------------------|
|                                              |               | Side effects perceived         | No side effects perceived       | Adjusted odds ratio (95% CI) <sup>a</sup> | Side effects perceived         | No side effects perceived       | Adjusted odds ratio (95% CI) <sup>a</sup> |
| Parent gender                                | Male          | 17 (40.5)                      | 25 (59.5)                       | 0.812 (0.309 to 2.133)                    | 15 (41.7)                      | 21 (58.3)                       | 1.288 (0.465 to 3.563)                    |
|                                              | Female        | 81 (43.8)                      | 104 (56.2)                      | Reference                                 | 57 (34.8)                      | 107 (65.2)                      | Reference                                 |
| Parent age                                   | 45+           | 8 (50.0)                       | 8 (50.0)                        | 1.441 (0.426 to 4.876)                    | 4 (30.8)                       | 9 (69.2)                        | 0.770 (0.193 to 3.066)                    |
|                                              | 35–44         | 41 (40.2)                      | 61 (59.8)                       | 1.007 (0.461 to 2.201)                    | 34 (36.6)                      | 59 (63.4)                       | 1.068 (0.456 to 2.501)                    |
|                                              | 18–34         | 20 (39.2)                      | 31 (60.8)                       | Reference                                 | 15 (34.1)                      | 29 (65.9)                       | Reference                                 |
| Parent chronic illness                       | Present       | 18 (36.7)                      | 31 (63.3)                       | 0.572 (0.231 to 1.416)                    | 15 (34.1)                      | 29 (65.9)                       | 0.998 (0.389 to 2.563)                    |
|                                              | None          | 72 (43.9)                      | 92 (56.1)                       | Reference                                 | 47 (35.3)                      | 86 (64.7)                       | Reference                                 |
| Other “at risk” people in child’s household  | Yes           | 33 (40.7)                      | 48 (59.3)                       | 0.987 (0.472 to 2.064)                    | 23 (34.3)                      | 44 (65.7)                       | 0.865 (0.390 to 1.916)                    |
|                                              | No            | 50 (44.6)                      | 62 (55.4)                       | Reference                                 | 33 (35.5)                      | 60 (64.5)                       | Reference                                 |
| Child gender                                 | Male          | 56 (51.4)                      | 53 (48.6)                       | 2.232 (1.139 to 4.374)*                   | 38 (38.0)                      | 62 (62.0)                       | 1.176 (0.570 to 2.429)                    |
|                                              | Female        | 42 (35.9)                      | 75 (64.1)                       | Reference                                 | 34 (34.3)                      | 65 (65.7)                       | Reference                                 |
| First-born child                             | Yes           | 53 (40.2)                      | 79 (59.8)                       | 0.783 (0.383 to 1.598)                    | 35 (30.7)                      | 79 (69.3)                       | 0.914 (0.418 to 1.995)                    |
|                                              | No            | 38 (46.3)                      | 44 (53.7)                       | Reference                                 | 27 (42.2)                      | 37 (57.8)                       | Reference                                 |
| Child age                                    | Range 1–5     | $N = 98, M = 3.04, SD = 0.930$ | $N = 127, M = 3.13, SD = 0.917$ | 0.921 (0.630 to 1.346)                    | $N = 72, M = 3.15, SD = 1.016$ | $N = 126, M = 3.08, SD = 0.900$ | 1.297 (0.873 to 1.927)                    |
| Child chronic illness                        | Present       | 9 (50.0)                       | 9 (50.0)                        | 2.250 (0.635 to 7.970)                    | 6 (33.3)                       | 12 (66.7)                       | 0.965 (0.261 to 3.567)                    |
|                                              | None          | 82 (41.8)                      | 114 (58.2)                      | Reference                                 | 56 (35.0)                      | 104 (65.0)                      | Reference                                 |
| Child up-to-date with other routine vaccines | Not fully UTD | 5 (50.0)                       | 5 (50.0)                        | 1.157 (0.236 to 5.679)                    | 3 (50.0)                       | 3 (50.0)                        | 1.418 (0.207 to 9.724)                    |
|                                              | UTD           | 86 (42.6)                      | 116 (57.4)                      | Reference                                 | 59 (34.5)                      | 112 (65.5)                      | Reference                                 |

UTD up-to-date.

<sup>a</sup>Adjusting for all other personal characteristics (both parent and child, apart from child up-to-date vaccine status for other routine vaccines).

\* $p \leq .05$ .



**Table 2** Psychological predictors and associations with side effect reporting

| Category                                            | Perception statement                                                                 | Level                                                   | Side effects recalled at T2                           |                                                       |                                           | Side effects recalled at T3                           |                                                       |                                           |
|-----------------------------------------------------|--------------------------------------------------------------------------------------|---------------------------------------------------------|-------------------------------------------------------|-------------------------------------------------------|-------------------------------------------|-------------------------------------------------------|-------------------------------------------------------|-------------------------------------------|
|                                                     |                                                                                      |                                                         | Side effects perceived                                | No side effects perceived                             | Adjusted odds ratio (95% CI) <sup>a</sup> | Side effects perceived                                | No side effects perceived                             | Adjusted odds ratio (95% CI) <sup>a</sup> |
| Presence of pre-existing symptoms                   | Symptom in last 24 hr                                                                | No                                                      | 59 (41.8)                                             | 82 (58.2)                                             | Reference                                 | 45 (37.5)                                             | 75 (62.5)                                             | Reference                                 |
|                                                     |                                                                                      | Yes                                                     | 35 (44.3)                                             | 44 (55.7)                                             | 1.059<br>(0.501 to 2.241)                 | 23 (31.1)                                             | 51 (68.9)                                             | 0.723<br>(0.321 to 1.627)                 |
| Direct measure of expectation                       | Expectation for child to get side effects                                            | Five-point Likert<br>("very likely" to "very unlikely") | <i>N</i> = 98, <i>M</i> = 3.13,<br><i>SD</i> = 0.833  | <i>N</i> = 128, <i>M</i> = 2.62,<br><i>SD</i> = 0.940 | 2.085<br>(1.349 to 3.221)*                | <i>N</i> = 72, <i>M</i> = 3.06,<br><i>SD</i> = 0.870  | <i>N</i> = 127, <i>M</i> = 2.65,<br><i>SD</i> = 0.972 | 2.093<br>(1.325 to 3.306)*                |
| Suggestion of symptoms—expectation                  | Suggestion of causing side effects—friends/family/relatives                          | Four-point Likert<br>("very likely" to "very unlikely") | <i>N</i> = 61, <i>M</i> = 2.44,<br><i>SD</i> = 0.719  | <i>N</i> = 83, <i>M</i> = 2.41,<br><i>SD</i> = 0.750  | 1.315<br>(0.730 to 2.371)                 | <i>N</i> = 47, <i>M</i> = 2.43,<br><i>SD</i> = 0.773  | <i>N</i> = 83, <i>M</i> = 2.39,<br><i>SD</i> = 0.746  | 1.544<br>(0.796 to 2.993)                 |
|                                                     | Suggestion of causing side effects—Official websites/help lines/departments/agencies | Four-point Likert<br>("very likely" to "very unlikely") | <i>N</i> = 65, <i>M</i> = 2.09,<br><i>SD</i> = 0.701  | <i>N</i> = 94, <i>M</i> = 2.12,<br><i>SD</i> = 0.746  | 1.366<br>(0.759 to 2.458)                 | <i>N</i> = 44, <i>M</i> = 2.18,<br><i>SD</i> = 0.620  | <i>N</i> = 96, <i>M</i> = 2.05,<br><i>SD</i> = 0.745  | 1.803<br>(0.922 to 3.526)                 |
|                                                     | Suggestion of causing side effects—Media                                             | Four-point Likert<br>("very likely" to "very unlikely") | <i>N</i> = 49, <i>M</i> = 2.51,<br><i>SD</i> = 0.794  | <i>N</i> = 73, <i>M</i> = 2.42,<br><i>SD</i> = 0.865  | 1.869<br>(1.011 to 3.456)*                | <i>N</i> = 34, <i>M</i> = 2.53,<br><i>SD</i> = 0.861  | <i>N</i> = 72, <i>M</i> = 2.38,<br><i>SD</i> = 0.846  | 1.635<br>(0.836 to 3.197)                 |
|                                                     | Suggestion of causing side effects—NHS vaccination leaflet                           | Four-point Likert<br>("very likely" to "very unlikely") | <i>N</i> = 68, <i>M</i> = 2.26,<br><i>SD</i> = 0.745  | <i>N</i> = 98, <i>M</i> = 2.09,<br><i>SD</i> = 0.801  | 1.790<br>(1.018 to 3.148)*                | <i>N</i> = 45, <i>M</i> = 2.33,<br><i>SD</i> = 0.739  | <i>N</i> = 100, <i>M</i> = 2.04,<br><i>SD</i> = 0.790 | 2.146<br>(1.139 to 4.046)*                |
|                                                     | Suggestion of causing side effects—HCW suggestion in vaccine appointment             | Four-point Likert<br>("very likely" to "very unlikely") | <i>N</i> = 61, <i>M</i> = 2.64,<br><i>SD</i> = 0.708  | <i>N</i> = 69, <i>M</i> = 2.39,<br><i>SD</i> = 0.691  | 2.273<br>(1.152 to 4.487)*                | <i>N</i> = 41, <i>M</i> = 2.61,<br><i>SD</i> = 0.542  | <i>N</i> = 69, <i>M</i> = 2.42,<br><i>SD</i> = 0.736  | 1.703<br>(0.845 to 3.430)                 |
| Social observation—expectation                      | Suggestion of causing side effects—friends/family/relatives                          | By Trust<br>(range 2–16)                                | <i>N</i> = 60, <i>M</i> = 8.52,<br><i>SD</i> = 3.192  | <i>N</i> = 80, <i>M</i> = 8.20,<br><i>SD</i> = 2.826  | 1.128<br>(0.977 to 1.304)                 | <i>N</i> = 47, <i>M</i> = 8.38,<br><i>SD</i> = 3.274  | <i>N</i> = 81, <i>M</i> = 8.42,<br><i>SD</i> = 2.974  | 1.082<br>(0.932 to 1.256)                 |
|                                                     | Suggestion of causing side effects—Official websites/help lines/departments/agencies | By Trust<br>(range 2–20)                                | <i>N</i> = 65, <i>M</i> = 8.62,<br><i>SD</i> = 3.436  | <i>N</i> = 91, <i>M</i> = 8.79,<br><i>SD</i> = 3.501  | 1.023<br>(0.910 to 1.149)                 | <i>N</i> = 44, <i>M</i> = 8.68,<br><i>SD</i> = 3.483  | <i>N</i> = 93, <i>M</i> = 8.87,<br><i>SD</i> = 3.630  | 1.023<br>(0.899 to 1.165)                 |
|                                                     | Suggestion of causing side effects—Media                                             | By Trust<br>(range 2–20)                                | <i>N</i> = 49, <i>M</i> = 8.14,<br><i>SD</i> = 3.606  | <i>N</i> = 70, <i>M</i> = 7.56,<br><i>SD</i> = 3.010  | 1.130<br>(0.976 to 1.309)                 | <i>N</i> = 34, <i>M</i> = 8.00,<br><i>SD</i> = 3.822  | <i>N</i> = 69, <i>M</i> = 7.83,<br><i>SD</i> = 3.148  | 1.046<br>(0.887 to 1.233)                 |
|                                                     | Suggestion of causing side effects—NHS vaccination leaflet                           | By Trust<br>(range 1–20)                                | <i>N</i> = 68, <i>M</i> = 9.84,<br><i>SD</i> = 3.831  | <i>N</i> = 95, <i>M</i> = 9.14,<br><i>SD</i> = 3.869  | 1.094<br>(0.978 to 1.224)                 | <i>N</i> = 44, <i>M</i> = 10.09,<br><i>SD</i> = 4.022 | <i>N</i> = 97, <i>M</i> = 9.24,<br><i>SD</i> = 3.960  | 1.090<br>(0.967 to 1.229)                 |
|                                                     | Suggestion of causing side effects—HCW suggestion in vaccine appointment             | By Trust<br>(range 1–)                                  | <i>N</i> = 61, <i>M</i> = 11.52,<br><i>SD</i> = 3.581 | <i>N</i> = 69, <i>M</i> = 10.19,<br><i>SD</i> = 3.919 | 1.151<br>(1.016 to 1.303)*                | <i>N</i> = 41, <i>M</i> = 11.29,<br><i>SD</i> = 2.571 | <i>N</i> = 69, <i>M</i> = 10.38,<br><i>SD</i> = 4.236 | 1.074<br>(0.949 to 1.214)                 |
| Severity of side effects observed in other children | Knowing another child with side effects                                              | No                                                      | 82 (42.5)                                             | 111 (57.5)                                            | Reference                                 | 61 (35.3)                                             | 112 (64.7)                                            | Reference                                 |
|                                                     |                                                                                      | Yes                                                     | 16 (47.0)                                             | 18 (53.0)                                             | 1.546<br>(0.614 to 3.889)                 | 11 (40.7)                                             | 16 (59.3)                                             | 2.041<br>(0.763 to 5.462)                 |
|                                                     | Severity of side effects observed in other children                                  | Five-point Likert<br>("very mild to very severe")       | <i>N</i> = 16, <i>M</i> = 2.06,<br><i>SD</i> = 0.680  | <i>N</i> = 18, <i>M</i> = 2.06,<br><i>SD</i> = 0.539  | 2.240<br>(0.197 to 25.486)                | <i>N</i> = 11, <i>M</i> = 2.09,<br><i>SD</i> = 0.302  | <i>N</i> = 16, <i>M</i> = 1.94,<br><i>SD</i> = 0.443  | 3.344<br>(0.021 to 525.680)               |

Table 2 Continued

| Category                                           | Perception statement                                                     | Level                                              | Side effects recalled at T2                         |                                                      |                                           | Side effects recalled at T3                         |                                                      |                                           |
|----------------------------------------------------|--------------------------------------------------------------------------|----------------------------------------------------|-----------------------------------------------------|------------------------------------------------------|-------------------------------------------|-----------------------------------------------------|------------------------------------------------------|-------------------------------------------|
|                                                    |                                                                          |                                                    | Side effects perceived                              | No side effects perceived                            | Adjusted odds ratio (95% CI) <sup>a</sup> | Side effects perceived                              | No side effects perceived                            | Adjusted odds ratio (95% CI) <sup>a</sup> |
| Previous symptoms following vaccination            | Child having side effects from flu vaccine previously                    | No                                                 | 27 (43.5)                                           | 35 (56.5)                                            | Reference                                 | 18 (29.0)                                           | 44 (71.0)                                            | Reference                                 |
|                                                    |                                                                          | Yes                                                | 9 (37.5)                                            | 15 (62.5)                                            | 0.840<br>(0.219 to 3.229)                 | 8 (36.4)                                            | 14 (63.6)                                            | 2.097<br>(0.541 to 8.134)                 |
|                                                    | Worry about child's previous side effects                                | Four-point Likert ("not at all" to "very worried") | <i>N</i> = 9, <i>M</i> = 1.78, <i>SD</i> = 0.667    | <i>N</i> = 15, <i>M</i> = 1.60, <i>SD</i> = 0.828    | <sup>b</sup>                              | <i>N</i> = 8, <i>M</i> = 1.88, <i>SD</i> = 0.641    | <i>N</i> = 14, <i>M</i> = 1.64, <i>SD</i> = 0.929    | <sup>b</sup>                              |
|                                                    | Severity of child's previous side effects                                | Five-point Likert ("very mild" to "very severe")   | <i>N</i> = 9, <i>M</i> = 1.89, <i>SD</i> = 0.601    | <i>N</i> = 15, <i>M</i> = 1.33, <i>SD</i> = 0.488    | <sup>b</sup>                              | <i>N</i> = 8, <i>M</i> = 1.75, <i>SD</i> = 0.463    | <i>N</i> = 14, <i>M</i> = 1.29, <i>SD</i> = 0.469    | 16.704<br>(0.446 to 626.152)              |
|                                                    | Child side effect from other routine vaccines                            | No                                                 | 37 (34.9)                                           | 69 (65.1)                                            | Reference                                 | 27 (28.4)                                           | 68 (71.6)                                            | Reference                                 |
|                                                    |                                                                          | Yes                                                | 49 (50.5)                                           | 48 (49.5)                                            | 2.103<br>(0.997 to 4.434)                 | 34 (40.5)                                           | 50 (59.5)                                            | 1.842<br>(0.807 to 4.206)                 |
|                                                    | Worry about side effect from other routine vaccine                       | Four-point Likert ("not at all" to "very worried") | <i>N</i> = 49, <i>M</i> = 1.82, <i>SD</i> = 0.697   | <i>N</i> = 48, <i>M</i> = 1.75, <i>SD</i> = 0.601    | 0.915<br>(0.369 to 2.267)                 | <i>N</i> = 34, <i>M</i> = 1.75, <i>SD</i> = 0.463   | <i>N</i> = 50, <i>M</i> = 1.64, <i>SD</i> = 0.598    | 2.747<br>(0.975 to 7.738)                 |
|                                                    | Neuroticism (EPQR-A)                                                     | Range 0–6                                          | <i>N</i> = 91, <i>M</i> = 1.54, <i>SD</i> = 1.377   | <i>N</i> = 120, <i>M</i> = 1.72, <i>SD</i> = 1.685   | 0.940<br>(0.755 to 1.170)                 | <i>N</i> = 62, <i>M</i> = 1.69, <i>SD</i> = 1.421   | <i>N</i> = 114, <i>M</i> = 1.64, <i>SD</i> = 1.652   | 1.050<br>(0.830 to 1.328)                 |
|                                                    | Positive affect (PANAS)                                                  | Range 5–22                                         | <i>N</i> = 88, <i>M</i> = 15.39, <i>SD</i> = 3.978  | <i>N</i> = 119, <i>M</i> = 15.32, <i>SD</i> = 3.505  | 0.946<br>(0.862 to 1.038)                 | <i>N</i> = 62, <i>M</i> = 14.90, <i>SD</i> = 4.179  | <i>N</i> = 113, <i>M</i> = 15.51, <i>SD</i> = 3.368  | 0.933<br>(0.846 to 1.029)                 |
|                                                    | Negative affect (PANAS)                                                  | Range 5–18                                         | <i>N</i> = 88, <i>M</i> = 7.92, <i>SD</i> = 2.780   | <i>N</i> = 119, <i>M</i> = 7.45, <i>SD</i> = 2.727   | 1.051<br>(0.929 to 1.188)                 | <i>N</i> = 62, <i>M</i> = 7.77, <i>SD</i> = 2.439   | <i>N</i> = 113, <i>M</i> = 7.58, <i>SD</i> = 2.856   | 1.024<br>(0.889 to 1.166)                 |
|                                                    | Anxiety (STAI-T)                                                         | Range 6–19                                         | <i>N</i> = 91, <i>M</i> = 12.47, <i>SD</i> = 2.651  | <i>N</i> = 120, <i>M</i> = 12.87, <i>SD</i> = 2.634  | 0.993<br>(0.861 to 1.146)                 | <i>N</i> = 62, <i>M</i> = 13.08, <i>SD</i> = 2.491  | <i>N</i> = 114, <i>M</i> = 12.67, <i>SD</i> = 2.523  | 1.192<br>(1.011 to 1.406)*                |
|                                                    | Optimism (LOT-R)                                                         | Range 1–12                                         | <i>N</i> = 85, <i>M</i> = 7.53, <i>SD</i> = 1.817   | <i>N</i> = 115, <i>M</i> = 7.26, <i>SD</i> = 1.920   | 0.942<br>(0.783 to 1.134)                 | <i>N</i> = 61, <i>M</i> = 7.30, <i>SD</i> = 1.856   | <i>N</i> = 111, <i>M</i> = 7.40, <i>SD</i> = 1.997   | 0.843<br>(0.688 to 1.032)                 |
| Perceptions about medicines and other technologies | Pessimism (LOT-R)                                                        | Range 0–12                                         | <i>N</i> = 85, <i>M</i> = 4.29, <i>SD</i> = 2.109   | <i>N</i> = 115, <i>M</i> = 4.18, <i>SD</i> = 2.134   | 1.147<br>(0.966 to 1.363)                 | <i>N</i> = 61, <i>M</i> = 4.51, <i>SD</i> = 1.776   | <i>N</i> = 111, <i>M</i> = 3.89, <i>SD</i> = 2.213   | 1.254<br>(1.035 to 1.518)*                |
|                                                    | Perceived sensitivity to medicines at T1 (PSM-T1)                        | Range 5–25                                         | <i>N</i> = 98, <i>M</i> = 10.48, <i>SD</i> = 3.253  | <i>N</i> = 129, <i>M</i> = 9.40, <i>SD</i> = 3.404   | 1.074<br>(0.970 to 1.189)                 | <i>N</i> = 72, <i>M</i> = 10.51, <i>SD</i> = 2.722  | <i>N</i> = 128, <i>M</i> = 9.30, <i>SD</i> = 3.476   | 1.150<br>(1.030 to 1.285)*                |
|                                                    | Modern Health Worries (MHW)                                              | Range 28–126                                       | <i>N</i> = 88, <i>M</i> = 67.32, <i>SD</i> = 22.696 | <i>N</i> = 118, <i>M</i> = 67.53, <i>SD</i> = 20.288 | 0.987<br>(0.969 to 1.005)                 | <i>N</i> = 62, <i>M</i> = 68.34, <i>SD</i> = 21.907 | <i>N</i> = 113, <i>M</i> = 66.25, <i>SD</i> = 19.386 | 1.004<br>(0.985 to 1.024)                 |
|                                                    | Beliefs About Medicines Questionnaire-general, harm subscale (BMQ-GH)    | Range 4–20                                         | <i>N</i> = 91, <i>M</i> = 8.73, <i>SD</i> = 2.539   | <i>N</i> = 121, <i>M</i> = 8.59, <i>SD</i> = 2.728   | 1.016<br>(0.889 to 1.161)                 | <i>N</i> = 62, <i>M</i> = 8.55, <i>SD</i> = 2.559   | <i>N</i> = 115, <i>M</i> = 8.45, <i>SD</i> = 2.722   | 1.015<br>(0.881 to 1.169)                 |
|                                                    | Beliefs About Medicines Questionnaire-general, overuse subscale (BMQ-GO) | Range 5–19                                         | <i>N</i> = 91, <i>M</i> = 10.84, <i>SD</i> = 2.391  | <i>N</i> = 121, <i>M</i> = 10.72, <i>SD</i> = 2.742  | 1.032<br>(0.905 to 1.176)                 | <i>N</i> = 62, <i>M</i> = 10.79, <i>SD</i> = 2.593  | <i>N</i> = 115, <i>M</i> = 10.49, <i>SD</i> = 2.716  | 1.079<br>(0.939 to 1.240)                 |

NHS National Health Service, *HCW* health care worker.<sup>a</sup>Adjusting for all personal characteristics (both parent and child, apart from child up-to-date vaccine status for other routine vaccines).<sup>b</sup>Adjusted calculations unable to be run due to lack of cases in some groups.\**p* ≤ .05.

**Table 3** General attitudes and associations with side effect reporting

| Perception statement                                                                               | Level    | Side effects recalled at T2 |                           |                                           | Side effects recalled at T3 |                           |                                           |
|----------------------------------------------------------------------------------------------------|----------|-----------------------------|---------------------------|-------------------------------------------|-----------------------------|---------------------------|-------------------------------------------|
|                                                                                                    |          | Side effects perceived      | No side effects perceived | Adjusted odds ratio (95% CI) <sup>a</sup> | Side effects perceived      | No side effects perceived | Adjusted odds ratio (95% CI) <sup>a</sup> |
| The child flu vaccine has not been tested enough for me to feel it is safe                         | Agree    | 9 (60.0)                    | 6 (40.0)                  | 1.188<br>(0.248 to 5.690)                 | 8 (66.7)                    | 4 (33.3)                  | 6.466<br>(1.083 to 38.586)*               |
| The child flu vaccine can cause unpleasant short-term side effects                                 | Disagree | 58 (40.0)                   | 87 (60.0)                 | Reference                                 | 42 (30.2)                   | 97 (69.8)                 | Reference                                 |
|                                                                                                    | Agree    | 23 (57.5)                   | 17 (42.5)                 | 1.549<br>(0.566 to 4.235)                 | 11 (36.7)                   | 19 (63.3)                 | 1.354<br>(0.438 to 4.184)                 |
| The child flu vaccine can cause long-term health problems                                          | Disagree | 36 (39.6)                   | 55 (60.4)                 | Reference                                 | 26 (28.6)                   | 65 (71.4)                 | Reference                                 |
|                                                                                                    | Agree    | 1 (50.0)                    | 1 (50.0)                  | 0.000 <sup>b</sup>                        | 2 (66.7)                    | 1 (33.3)                  | <sup>b</sup>                              |
| The child flu vaccine does not suit my religious or cultural beliefs/values                        | Disagree | 72 (42.9)                   | 96 (57.1)                 | Reference                                 | 48 (31.4)                   | 105 (68.6)                | Reference                                 |
|                                                                                                    | Agree    | 6 (85.7)                    | 1 (14.3)                  | 4.811<br>(0.464 to 49.858)                | 3 (75.0)                    | 1 (25.0)                  | 2.043<br>(0.115 to 36.171)                |
| I do not like [child] having vaccinations in general                                               | Disagree | 76 (42.2)                   | 104 (57.8)                | Reference                                 | 53 (32.3)                   | 111 (67.7)                | Reference                                 |
|                                                                                                    | Agree    | 6 (75.0)                    | 2 (25.0)                  | 2.926<br>(0.393 to 21.762)                | 3 (60.0)                    | 2 (40.0)                  | 4.227<br>(0.320 to 55.808)                |
| I do not know enough about the child flu vaccine                                                   | Disagree | 81 (44.5)                   | 101 (55.5)                | Reference                                 | 61 (37.7)                   | 101 (62.3)                | Reference                                 |
|                                                                                                    | Agree    | 24 (49.0)                   | 25 (51.0)                 | 1.414<br>(0.555 to 3.605)                 | 20 (50.0)                   | 20 (50.0)                 | 3.014<br>(1.033 to 8.797)*                |
| The vaccination campaign is just about making money for the manufacturers                          | Disagree | 48 (44.9)                   | 59 (55.1)                 | Reference                                 | 36 (35.3)                   | 66 (64.7)                 | Reference                                 |
|                                                                                                    | Agree    | 3 (42.9)                    | 4 (57.1)                  | 0.275<br>(0.014 to 5.229)                 | 4 (66.7)                    | 2 (33.3)                  | 4.940<br>(0.367 to 66.515)                |
| The flu vaccine would interact with other medications that [specified child] is currently taking   | Disagree | 73 (43.2)                   | 96 (56.8)                 | Reference                                 | 52 (32.9)                   | 106 (67.1)                | Reference                                 |
|                                                                                                    | Agree    | 0                           | 0                         | <sup>b</sup>                              | 1 (100.0)                   | 0 (0.0)                   | <sup>b</sup>                              |
| Vaccinating [specified child] against flu each year will overload his/her immune system            | Disagree | 129 (59.2)                  | 89 (40.8)                 | Reference                                 | 52 (34.4)                   | 99 (65.6)                 | Reference                                 |
|                                                                                                    | Agree    | 9 (69.2)                    | 4 (30.8)                  | 1.377<br>(0.267 to 7.095)                 | 5 (50.0)                    | 5 (50.0)                  | 2.363<br>(0.417 to 13.388)                |
| Vaccinating [child] against flu each year is too much of an ongoing time commitment                | Disagree | 72 (41.9)                   | 100 (58.1)                | Reference                                 | 53 (33.8)                   | 104 (66.2)                | Reference                                 |
|                                                                                                    | Agree    | 3 (33.3)                    | 6 (66.7)                  | 1.161<br>(0.146 to 9.220)                 | 2 (28.6)                    | 5 (71.4)                  | 1.099<br>(0.088 to 13.705)                |
| Having the child flu vaccine is an effective way of preventing [specified child] from catching flu | Disagree | 82 (42.7)                   | 110 (57.3)                | Reference                                 | 64 (37.0)                   | 109 (63.0)                | Reference                                 |
|                                                                                                    | Agree    | 81 (43.3)                   | 106 (56.7)                | 0.673<br>(0.173 to 2.612)                 | 63 (37.0)                   | 107 (63.0)                | 2.455 (0.481 to 12.531)                   |
|                                                                                                    | Disagree | 7 (46.6)                    | 8 (53.3)                  | Reference                                 | 3 (23.1)                    | 10 (76.9)                 | Reference                                 |



**Table 3** *Continued*

| Perception statement                                                                | Level                                                               | Side effects recalled at T2                             |                                                          |                                           | Side effects recalled at T3                               |                                                       |                                           |
|-------------------------------------------------------------------------------------|---------------------------------------------------------------------|---------------------------------------------------------|----------------------------------------------------------|-------------------------------------------|-----------------------------------------------------------|-------------------------------------------------------|-------------------------------------------|
|                                                                                     |                                                                     | Side effects perceived                                  | No side effects perceived                                | Adjusted odds ratio (95% CI) <sup>a</sup> | Side effects perceived                                    | No side effects perceived                             | Adjusted odds ratio (95% CI) <sup>a</sup> |
| If I do not vaccinate [child], then [child] is likely to catch flu                  | Agree                                                               | 28 (52.8)                                               | 25 (47.2)                                                | 1.198<br>(0.477 to 3.006)                 | 23 (44.2)                                                 | 29 (55.8)                                             | 1.858<br>(0.688 to 5.018)                 |
| Flu would be a serious illness for child                                            | Disagree                                                            | 33 (45.2)                                               | 40 (54.8)                                                | Reference                                 | 18 (30.0)                                                 | 42 (70.0)                                             | Reference                                 |
|                                                                                     | Agree                                                               | 55 (40.4)                                               | 81 (59.6)                                                | 0.705<br>(0.254 to 1.954)                 | 41 (33.9)                                                 | 80 (66.1)                                             | 0.896<br>(0.303 to 2.647)                 |
| Flu would be a serious illness for self                                             | Disagree                                                            | 14 (41.2)                                               | 20 (58.8)                                                | Reference                                 | 8 (32.0)                                                  | 17 (68.0)                                             | Reference                                 |
|                                                                                     | Agree                                                               | 42 (41.2)                                               | 60 (58.8)                                                | 0.821<br>(0.348 to 1.940)                 | 32 (36.4)                                                 | 56 (63.6)                                             | 1.377<br>(0.536 to 3.534)                 |
| Flu would be a serious illness for someone in child's household                     | Disagree                                                            | 24 (42.1)                                               | 33 (57.9)                                                | Reference                                 | 12 (27.3)                                                 | 32 (72.7)                                             | Reference                                 |
|                                                                                     | Agree                                                               | 54 (44.3)                                               | 68 (55.7)                                                | 1.094<br>(0.456 to 2.621)                 | 38 (36.2)                                                 | 67 (63.8)                                             | 1.108<br>(0.426 to 2.883)                 |
| If [child] were to catch flu, how much, if at all, would it impact your daily life? | Disagree                                                            | 18 (38.3)                                               | 29 (61.7)                                                | Reference                                 | 11 (31.4)                                                 | 24 (68.6)                                             | Reference                                 |
|                                                                                     | Four-point Likert ("not at all" to "a great extent") <sup>(c)</sup> | <i>N</i> = 91,<br><i>M</i> = 3.41,<br><i>SD</i> = 0.683 | <i>N</i> = 122,<br><i>M</i> = 3.41,<br><i>SD</i> = 0.586 | 0.915<br>(0.514 to 1.628)                 | <i>N</i> = 162,<br><i>M</i> = 3.339,<br><i>SD</i> = 0.598 | <i>N</i> = 115, <i>M</i> = 3.50,<br><i>SD</i> = 0.598 | 0.814<br>(0.441 to 1.500)                 |

<sup>a</sup>Adjusting for all personal characteristics (both parent and child, apart from child up-to-date vaccine status for other routine vaccines).<sup>b</sup>Adjusted calculations unable to be run due to lack of cases in some groups.<sup>c</sup>*p* ≤ .05.

**Table 4** Mediation analyses for effect of direct expectation as a mediator on perception of side effects at T2 and T3

| Independent variable                                       | Mediator           | Dependent variable          | Total indirect effect (95% CI) <sup>a</sup> | Direct effect (95% CI)  | Total effect (95% CI) <sup>a</sup> | Proportion of effect mediated (%) |
|------------------------------------------------------------|--------------------|-----------------------------|---------------------------------------------|-------------------------|------------------------------------|-----------------------------------|
| Suggestion of causing side effects–Media                   | Direct expectation | Side effects recalled at T2 | 0.103 (0.005 to 0.251)*                     | 0.158 (−0.196 to 0.408) | 0.261 (−0.092 to 0.496)            | 39.48                             |
| Suggestion of causing side effects–NHS vaccination leaflet | Direct expectation | Side effects recalled at T2 | 0.143 (0.033 to 0.307)*                     | 0.080 (−0.220 to 0.368) | 0.223 (−0.054 to 0.467)            | 64.14                             |
| Suggestion of causing side effects–NHS vaccination leaflet | Direct expectation | Side effects recalled at T3 | 0.095 (−0.039 to 0.273)                     | 0.208 (−0.106 to 0.474) | 0.304 (0.026 to 0.542)*            | Not significant                   |
| Perceived sensitivity to Medicines at T1 (PSM–T1)          | Direct expectation | Side effects recalled at T3 | 0.098 (0.020 to 0.210)*                     | 0.170 (−0.050 to 0.380) | 0.269 (0.060 to 0.460)*            | 36.61                             |
| Pessimism (LOT–R)                                          | Direct expectation | Side effects recalled at T3 | 0.038 (−0.014 to 0.125)                     | 0.210 (−0.057 to 0.406) | 0.248 (−0.018 to 0.447)            | Not significant                   |

NHS National Health Service.

<sup>a</sup> Adjusting for all personal characteristics (both parent and child, apart from child up-to-date vaccine status for other routine vaccines).

\* $p \leq .05$ .

**Table 5** Participants' personal characteristics and associations with intention to vaccinate

| Participant characteristics                  | Level         | Intention to vaccinate child next flu season |                                          | Adjusted odds ratio (95% CI) <sup>a</sup> |
|----------------------------------------------|---------------|----------------------------------------------|------------------------------------------|-------------------------------------------|
|                                              |               | Do not intend to vaccinate                   | Intend to vaccinate                      |                                           |
| Parent gender                                | Female        | 38 (19.0)                                    | 162 (81.0)                               | 0.397 (0.078 to 2.004)                    |
|                                              | Male          | 2 (4.5)                                      | 42 (95.5)                                | Reference                                 |
| Parent age                                   | 45+           | 1 (6.3)                                      | 15 (93.8)                                | 5.277 (0.587 to 47.468)                   |
|                                              | 35–44         | 17 (16.5)                                    | 86 (83.5)                                | 2.932 (1.049 to 8.196)*                   |
|                                              | 18–34         | 12 (23.1)                                    | 40 (76.9)                                | Reference                                 |
| Parent chronic illness                       | Present       | 7 (14.0)                                     | 43 (86.0)                                | 2.289 (0.562 to 9.325)                    |
|                                              | None          | 30 (18.2)                                    | 135 (81.8)                               | Reference                                 |
| Other “at risk” people in child's household  | Yes           | 14 (17.3)                                    | 67 (82.7)                                | 0.597 (0.221 to 1.617)                    |
|                                              | No            | 15 (13.2)                                    | 99 (86.8)                                | Reference                                 |
| Child gender                                 | Female        | 21 (16.4)                                    | 107 (83.6)                               | 1.714 (0.665 to 4.420)                    |
|                                              | Male          | 18 (15.7)                                    | 97 (84.3)                                | Reference                                 |
| First-born child                             | Yes           | 23 (17.3)                                    | 110 (82.7)                               | 0.776 (0.279 to 2.160)                    |
|                                              | No            | 14 (16.9)                                    | 69 (83.1)                                | Reference                                 |
| Child age                                    | Range 1–5     | $N = 39$ , $M = 3.23$ ,<br>$SD = 1.038$      | $N = 203$ , $M = 3.07$ ,<br>$SD = 0.890$ | 0.725 (0.432 to 1.216)                    |
| Child chronic illness                        | Present       | 2 (11.1)                                     | 16 (88.9)                                | 2.389 (0.241 to 23.669)                   |
|                                              | None          | 35 (17.7)                                    | 163 (82.3)                               | Reference                                 |
| Child up-to-date with other routine vaccines | Not fully UTD | 1 (10.0)                                     | 9 (90.0)                                 | 1.421 (0.149 to 13.588)                   |
|                                              | UTD           | 36 (17.6)                                    | 168 (82.4)                               | Reference                                 |

UTD up-to-date.

<sup>a</sup>Adjusting for all other personal characteristics (both parent and child, apart from child up-to-date vaccine status for other routine vaccines).

\* $p \leq .05$ .

### Sensitivity analyses

We ran sensitivity analyses to identify whether clustering by primary care practice affected the significance of any of the results. We used mixed models, including primary care practice as a random effect in the regressions. For mediation analyses, we followed the same approach to see if clustering affected pathways.

All analyses controlled for personal and clinical characteristics and were run in SPSS version 22 [58], apart from mediation analyses which were run in STATA 12 [59]. The binary mediation macro was used, which allows for dichotomous outcomes as well as taking covariates into account.

## Results

### Participants

Two hundred seventy participants were recruited from 14 primary care practices. Two hundred thirty-three participants initiated T2 follow-up, with 202 (74.8%; 185 mothers) participants completing all items. Two hundred participants initiated T3 follow-up, with 195 (72.2%; 164 mothers) completing all items. One hundred sixty-seven participants

(61.9%) completed both follow-ups. Participants' personal characteristics can be found in Table 1.

### Side effect reporting

At T2, 98 people out of 227 who completed the question (43.2%, 95% CI, 36.7 to 49.7) reported at least one side effect. At T3, 72 people (out of 200, 36.0%, 95% CI, 29.3 to 42.7) recalled at least one side effect. Associations between personal characteristics, predictor variables and side effect report can be found in Tables 1 to 3.

At T2, parents were more likely to report side effects in boys, if they had expected their child to experience side effects and if they had perceived a suggestion of side effects from the media, NHS vaccination leaflet, or health care worker during their vaccination appointment. When taking into account both trust and suggestion, only suggestions from health care workers increased the odds of reporting side effects.

At T3, parents were more likely to recall that their child had experienced side effects if they had expected side effects, perceived a suggestion of side effects from the NHS vaccination leaflet, had high trait anxiety, high pessimism, and if they perceived their child to be sensitive to

**Table 6** Associations between variables and intention to vaccinate

| Category                       | Perception statement                         | Level                                                | Intention to vaccinate child next flu season       |                                                     |                                           |
|--------------------------------|----------------------------------------------|------------------------------------------------------|----------------------------------------------------|-----------------------------------------------------|-------------------------------------------|
|                                |                                              |                                                      | Do not intend to vaccinate                         | Intend to vaccinate                                 | Adjusted odds ratio (95% CI) <sup>a</sup> |
| Symptoms following vaccination | Presence of side effects as recalled at T2   | Yes                                                  | 21 (21.4)                                          | 77 (78.6)                                           | 0.627<br>(0.242 to 1.622)                 |
|                                |                                              | No                                                   | 17 (13.2)                                          | 112 (86.8)                                          | Reference                                 |
|                                | Worry about side effects as recalled at T2   | Four-point Likert (“not at all” to “very worried”)   | <i>N</i> = 21, <i>M</i> = 2.19, <i>SD</i> = 1.030  | <i>N</i> = 79, <i>M</i> = 1.49, <i>SD</i> = 0.575   | 0.258<br>(0.076 to 0.874)*                |
|                                | Severity of side effects as recalled at T2   | Five-point Likert (“very mild” to “very severe”)     | <i>N</i> = 21, <i>M</i> = 2.48, <i>SD</i> = 0.873  | <i>N</i> = 79, <i>M</i> = 1.70, <i>SD</i> = 0.790   | 0.110<br>(0.020 to 0.598)*                |
|                                | Presence of side effects as recalled at T3   | Yes                                                  | 16 (22.2)                                          | 56 (77.8)                                           | 0.272<br>(0.090 to 0.825)*                |
|                                |                                              | No                                                   | 13 (10.2)                                          | 115 (89.8)                                          | Reference                                 |
| Psychological predictors       | Worry about side effects as recalled at T3   | Four-point Likert (“not at all” to “very worried”)   | <i>N</i> = 15, <i>M</i> = 2.00, <i>SD</i> = 0.926  | <i>N</i> = 55, <i>M</i> = 1.55, <i>SD</i> = 0.662   | 0.165<br>(0.029 to 0.923)*                |
|                                | Severity of side effects as recalled at T3   | Five-point Likert (“very mild” to “very severe”)     | <i>N</i> = 14, <i>M</i> = 2.29, <i>SD</i> = 0.914  | <i>N</i> = 52, <i>M</i> = 1.75, <i>SD</i> = 0.789   | 0.310<br>(0.084 to 1.144)                 |
|                                | HCW suggestion in vaccine appointment        | Four-point Likert (“very likely” to “very unlikely”) | <i>N</i> = 21, <i>M</i> = 2.48, <i>SD</i> = 0.873  | <i>N</i> = 111, <i>M</i> = 2.50, <i>SD</i> = 0.686  | 1.821<br>(0.670 to 4.950)                 |
|                                | HCW suggestion in vaccine appointment        | Suggestion by trust, range 1–20                      | <i>N</i> = 21, <i>M</i> = 9.57, <i>SD</i> = 5.316  | <i>N</i> = 11, <i>M</i> = 10.97, <i>SD</i> = 3.528  | 1.297<br>(1.052 to 1.598)*                |
|                                | Change in perceived sensitivity to medicines | Range –20–8                                          | <i>N</i> = 28, <i>M</i> = –0.18, <i>SD</i> = 2.749 | <i>N</i> = 166, <i>M</i> = –0.33, <i>SD</i> = 3.449 | 1.002<br>(0.868 to 1.170)                 |

HCW health care worker.

<sup>a</sup>Adjusting for all personal characteristics (both parent and child, apart from child up-to-date vaccine status for other routine vaccines).

\**p* ≤ .05.

medicines. Perceiving oneself not to know enough about the vaccine and feeling that the vaccine is not safe were also associated with the recall of side effects at T3.

#### Expectation as a mediator

When controlling for personal and clinical characteristics, there was an indirect effect of suggestion of side effects from the media ( $\beta = .103$ , 95% CI, 0.005 to 0.251; see Table 4) through expectation on side effects reported at T2. There was also an indirect effect of suggestion of side effects from the NHS vaccination leaflet ( $\beta = .143$ , 95% CI, 0.033 to 0.307) through expectation on side effects reported at T2. At T3, there was no evidence for an indirect effect of suggestion of side effects from the NHS vaccination leaflet or pessimism through expectation, on recall of side effects. There was, however, an indirect effect of PSM through expectation on side effects recalled ( $\beta = .098$ , 95% CI, 0.020 to 0.210); the total effect of the mediation model was significant ( $\beta = .269$ , 95% CI, 0.060 to 0.460), with 36.6% of the effect mediated.

#### Intention to vaccinate

Two hundred four (83.6%, 95% CI, 78.9 to 88.3) parents indicated that they definitely intended to vaccinate their child in the next influenza season (2017–2018), while 40 (16.4%, 95% CI, 11.7 to 21.1) indicated that they did not definitely intend to vaccinate their child. Associations between personal characteristics, predictor variables, and vaccination intention can be found in Tables 5 and 6.

Parent age was associated with intention, with parents aged 35–44 having higher vaccination intention. Parental worry about side effects at T2 and perceived severity of side effects at T2 were also associated with decreased intention to vaccinate. At T3, parental recall that one's child experienced a side effect and worry about the side effects were associated with decreased intention.

#### PSM

At T1, the overall mean PSM score was 10.03 (*SD* = 3.34, *n* = 270), while at T3 it was 9.40 (*SD* = 3.36, *n* = 194),  $t(193) = 1.264$ , *p* = .21.

**Table 7** Associations between reporting side effects at T2 and T3 and parents' perceived sensitivity of their child to medicines

| Side effect reporting       | Level                     | Perceived sensitivity to medicines         |                                |                         |         |          |          |                                |
|-----------------------------|---------------------------|--------------------------------------------|--------------------------------|-------------------------|---------|----------|----------|--------------------------------|
|                             |                           | <i>N</i> , mean, <i>SD</i>                 | Adjusted <i>B</i> <sup>a</sup> | Standard error <i>B</i> | $\beta$ | <i>t</i> | <i>p</i> | Adjusted <i>R</i> <sup>2</sup> |
| Side effects recalled at T2 | Side effects perceived    | <i>N</i> = 73,<br>M = −0.29,<br>SD = 3.10  | 0.422                          | 0.533                   | .061    | 0.793    | .430     | .291                           |
|                             | No side effects perceived | <i>N</i> = 104,<br>M = −0.28,<br>SD = 3.33 | Reference                      |                         |         |          |          |                                |
| Side effects recalled at T3 | Side effects recalled     | <i>N</i> = 71,<br>M = −0.47,<br>SD = 3.40  | 1.466                          | 0.526                   | .204    | 2.786    | .006*    | .342                           |
|                             | No side effects recalled  | <i>N</i> = 123,<br>M = −0.01,<br>SD = 3.27 | Reference                      |                         |         |          |          |                                |

<sup>a</sup>Adjusting for all personal characteristics (both parent and child, apart from child up-to-date vaccine status for other routine vaccines, and perceived sensitivity to medicines at T1).

\**p* ≤ .05.

Although there was no association between reporting side effects at T2 and change in PSM score, a significant association was found at T3,  $\beta = .20$ ,  $t(183) = 2.79$ ,  $p = .006$  (see Table 7), with parents who recalled that their child experienced side effects tending to increase their rating of their child's perceived sensitivity to medicines.

### Sensitivity analyses

Sensitivity analyses indicated that there were no substantial differences to the results when taking into account the effect of clustering by primary care practice. Only two results were changed: worry about side effects at T3 was no longer significantly associated with intention to vaccinate and side effects recalled at T3 was no longer significantly associated with change in parental perceived sensitivity to medicines. For the mediation analyses, there was no difference to the strength or the significance of any of the main pathway effects. Thus, clustering should not change the results of the binary mediation analysis macro.

### Discussion

Concern about side effects is a common reason for declining vaccination [4]. This is a potential problem for the influenza vaccine for which side effects are common and yearly vaccination is recommended. As might be expected in a cohort of parents who have already vaccinated their child once [5], most of our participants intended to vaccinate their child again the following year. However, one in six parents were less than certain in their intentions. Factors that strongly predicted being uncertain were the perceived severity and worry about side effects 3 days after vaccination and recalling 1 month later that the child had experienced side effects. These findings suggest

that providing reassurance to parents about the typically transitory and nonharmful nature of side effects may be a useful strategy in reducing long-term attrition among parents who initially vaccinate their child.

Pre-vaccination expectations were strongly associated with side effect reporting both 3 days and 1 month after vaccination, indicating the stability of expectations as a predictive factor over time. These results confirm previous findings from cross-sectional research [28] and are in line with a substantial body of work suggesting that expectations make symptom perception in oneself more likely [24], at least partly because of the increased monitoring for symptoms that can occur as a result of increased expectation. To our knowledge, this is the first time the role of expectation has been demonstrated for the perception of side effects in someone else, presumably as a result of a similar monitoring-related mechanism.

Parents who thought that the NHS vaccination leaflet, health care workers, or the media had suggested the vaccine causes side effects were also more likely to report side effects 3 days after vaccination. Surprisingly, when taking into account parental trust about the source of information, only suggestion from the health care worker remained significant. This indicates that parents' immediate perception of side effects may be influenced by the number and recent nature of suggestions of side effects received, in line with the availability heuristic [60]. The effect of suggestion from both the media and the NHS vaccination leaflet were mediated by direct expectation. Only suggestion of side effects from the NHS vaccination leaflet was associated with side effect reporting at 1 month; however, implying that while suggestions are important for immediate perception of symptoms, they may be less important in the longer-term recall of those symptoms.



In terms of practical implications, these results suggest that reducing expectations may help limit the perception of side effects. In particular, influential sources, such as the NHS vaccination leaflet and health care workers could aim to minimize their suggestion of the incidence of side effects. Although these sources have an obligation to inform patients about potentially serious adverse effects of medication, research has shown that the phrasing currently used by information sources causes people to substantially overestimate the likelihood of side effects [9, 26]. Our findings add weight to calls for this to be corrected [26].

Interestingly, although learning and social observation are associated with the nocebo response [24], we found no effect of having seen other children experience side effects from the vaccine or having previously perceived side effects from vaccination in one's own child, on reporting of side effects. One possible reason for this may be that symptom perception is not happening in the self, as in previous research, but in one's child. In this situation, parents are unable to access bodily cues and sensations, but must attend to and interpret their child's behavior [61]. It is possible that social observation specifically affects bodily sensations.

We also found a gender difference in perception of side effects, with parents being more likely to report side effects in boys than girls 3 days after vaccination. The reasons for this are unclear. In contrast to our results, one previous study found that 3 days following their child's diphtheria, pertussis, and tetanus vaccination, a higher proportion of mothers who contacted health care workers did so about their female child's side effects [62]. However, these results may not be directly comparable, as they relate to parental behavior in response to side effects, rather than perception of side effects per se [63].

Exclusively associated with recall of side effects at T3 were uncertainty-related beliefs such as believing the vaccine had not been tested enough and feeling that one did not know enough about the vaccine, as well as personality traits such as anxiety and pessimism. The effect of uncertainty-related beliefs and personality traits should be taken with caution as confidence intervals for the effect of the former were wide, and the effect sizes of the latter were small. However, these results suggest that different factors are more influential for the medium-term recall of side effects compared with the immediate perception of side effects, and is consistent with findings that general negative affect is associated with negative memory bias [64].

The perception that one's child is particularly sensitive to medicines was also associated with recall of side effects at T3. This effect was found to be mediated by direct expectation. Again, this is consistent with evidence suggesting that such perceptions can prompt people to monitor for evidence that is in line with their expectations [13]. We also found evidence that a feedback loop might be in operation—parents who recalled symptoms at T3 also

tended to have elevated perceptions of their child's sensitivity to medicines. However, these results should be taken with caution as there was no longer an association when taking into account clustering by primary care practice. Whether this effect persists in the long term is unknown.

## Limitations

Several limitations should be considered for this study. First, our sample may not be fully representative of the wider population of vaccinating parents. However, rates of side effect perception identified in this study (43.2%) are close to those found in clinical trial data (47.9%) [46] and a previous demographically representative survey (41.0%) [9] suggesting that no systematic bias exists with regard to our main outcome. Our sample is mostly made up of mothers and we cannot say whether these findings would hold in a population of fathers. Second, not all potential predictors were measured at T1, due to time constraints as parents completed materials before their child's vaccination appointment. However, only variables which should not change between time points, including demographics and personality traits, were asked at T2. Third, the interpretation of some results should be taken with caution due to low numbers and resulting wide confidence intervals. Results should be interpreted with caution due to the large number of analyses run, which increases the likelihood of type 1 errors.

## Conclusions

Our study suggests that to decrease side effect perception and recall, and increase vaccination intention, parental expectations of side effects following vaccination should be minimized, and that parents should be reassured about the generally mild nature of these side effects. This could be achieved through different avenues, but influential sources, such as the NHS vaccination leaflet and health care workers, should disseminate this message. By managing parents' expectations about the incidence, severity, and associated concern about side effects, more parents may decide to re-vaccinate their child.

## Supplementary Material

Supplementary material is available at *Annals of Behavioral Medicine* online.

**Acknowledgments** The authors would like to thank Dr. Ben Carter and Dr. Ewan Carr for their advice with the analyses. L.E. Smith is funded by the Economic and Social Research Council through a Doctoral Training Centre Studentship. The research was funded by the National Institute for Health Research Health Protection Research Unit (NIHR HPRU) in Emergency Preparedness and Response at King's College London in partnership with Public

Health England (PHE). All authors are based at King's College London. The views expressed are those of the author(s) and not necessarily those of the NHS, the NIHR, the Department of Health or Public Health England.

### Compliance with Ethical Standards

**Authors' Statement of Conflict of Interest and Adherence to Ethical Standards** The authors declare that they have no conflict of interest.

**Authors' Contributions** The study was conceived by L. E. Smith and G. J. Rubin. L. E. Smith wrote the first draft of the manuscript. All authors contributed to subsequent drafts.

**Ethical Approval** All procedures performed in studies involving human participants were in accordance with the ethical standards of the institutional and/or national research committee and with the 1964 Helsinki declaration and its later amendments or comparable ethical standards.

**Informed Consent** Before completing T1 materials, consent was obtained from all parents following standard practice from our research ethics committee.

### References

- Public Health England. *Extension of the Influenza Immunisation Programme to Children in England*. London, UK: Public Health England; 2016.
- Department of Health, Public Health England, NHS England. *The national flu immunisation programme 2015/16*. 2015. Available at [https://www.gov.uk/government/uploads/system/uploads/attachment\\_data/file/418428/Annual\\_flu\\_letter\\_24\\_03\\_15\\_FINALv3\\_para9.pdf](https://www.gov.uk/government/uploads/system/uploads/attachment_data/file/418428/Annual_flu_letter_24_03_15_FINALv3_para9.pdf). Accessibility verified May 26, 2018.
- Department of Health, Public Health England, NHS England. *The national flu immunisation programme 2016/17*. 2016. Available at [https://www.gov.uk/government/uploads/system/uploads/attachment\\_data/file/525968/Annual\\_flu\\_letter\\_2016\\_2017.pdf](https://www.gov.uk/government/uploads/system/uploads/attachment_data/file/525968/Annual_flu_letter_2016_2017.pdf). Accessibility verified May 26, 2018.
- Smith LE, Amlôt R, Weinman J, Yiend J, Rubin GJ. A systematic review of factors affecting vaccine uptake in young children. *Vaccine*. 2017;35:6059–6069.
- Bish A, Yardley L, Nicoll A, Michie S. Factors associated with uptake of vaccination against pandemic influenza: A systematic review. *Vaccine*. 2011;29:6472–6484.
- Falagas ME, Zarkadoulia E. Factors associated with sub-optimal compliance to vaccinations in children in developed countries: A systematic review. *Curr Med Res Opin*. 2008;24:1719–1741.
- Mills E, Jadad AR, Ross C, Wilson K. Systematic review of qualitative studies exploring parental beliefs and attitudes toward childhood vaccination identifies common barriers to vaccination. *J Clin Epidemiol*. 2005;58:1081–1088.
- European Medicines Agency. Assessment report. In: *Fluenza tetra. Common name: influenza vaccine (live attenuated, nasal)*. London: 2013. Available at [http://www.ema.europa.eu/docs/en\\_GB/document\\_library/EPAR\\_-\\_Public\\_assessment\\_report/human/002617/WC500158413.pdf](http://www.ema.europa.eu/docs/en_GB/document_library/EPAR_-_Public_assessment_report/human/002617/WC500158413.pdf). Accessibility verified May 26, 2018.
- Smith LE, Webster RK, Weinman J, Amlôt R, Yiend J, Rubin GJ. Psychological factors associated with uptake of the childhood influenza vaccine and perception of post-vaccination side effects: A cross-sectional survey in England. *Vaccine*. 2017;35:1936–1945.
- NHS Choices. *Consent to treatment*. Available at <https://www.nhs.uk/conditions/consent-to-treatment/children/>. Accessibility verified November 27, 2017.
- Konnopka A, Kaufmann C, König HH, et al. Association of costs with somatic symptom severity in patients with medically unexplained symptoms. *J Psychosom Res*. 2013;75:370–375.
- Petrie KJ, Moss-Morris R, Grey C, Shaw M. The relationship of negative affect and perceived sensitivity to symptom reporting following vaccination. *Br J Health Psychol*. 2004;9:101–111.
- Faasse K, Grey A, Horne R, Petrie KJ. High perceived sensitivity to medicines is associated with higher medical care utilisation, increased symptom reporting and greater information-seeking about medication. *Pharmacoepidemiol Drug Saf*. 2015;24:592–599.
- Petrie KJ, Sivertsen B, Hysing M, et al. Thoroughly modern worries: The relationship of worries about modernity to reported symptoms, health and medical care utilization. *J Psychosom Res*. 2001;51:395–401.
- Filipkowski KB, Smyth JM, Rutchick AM, et al. Do healthy people worry? Modern health worries, subjective health complaints, perceived health, and health care utilization. *Int J Behav Med*. 2010;17:182–188.
- Freyler A, Kohegyi Z, Köteles F, Kökönyi G, Bárdos G. Modern health worries, subjective somatic symptoms, somatosensory amplification, and health anxiety in adolescents. *J Health Psychol*. 2013;18:773–781.
- Rief W, Glaesmer H, Baehr V, Broadbent E, Brähler E, Petrie KJ. The relationship of modern health worries to depression, symptom reporting and quality of life in a general population survey. *J Psychosom Res*. 2012;72:318–320.
- Petrie KJ, Broadbent EA, Kley N, Moss-Morris R, Horne R, Rief W. Worries about modernity predict symptom complaints after environmental pesticide spraying. *Psychosom Med*. 2005;67:778–782.
- Petrie K, Thomas M, Broadbent E. Symptom complaints following aerial spraying with biological insecticide Foray 48B. *N Z Med J*. 2003;116:U354.
- Gureje O, Simon GE, Ustun TB, Goldberg DP. Somatization in cross-cultural perspective: A World Health Organization study in primary care. *Am J Psychiatry*. 1997;154:989–995.
- Schenk HM, Bos EH, Slaets JP, de Jonge P, Rosmalen JG. Differential association between affect and somatic symptoms at the between- and within-individual level. *Br J Health Psychol*. 2017;22:270–280.
- De Gucht V, Fischler B, Heiser W. Neuroticism, alexithymia, negative affect, and positive affect as determinants of medically unexplained symptoms. *Pers Individ Differ*. 2004;36:1655–1667.
- Faasse K, Gamble G, Cundy T, Petrie KJ. Impact of television coverage on the number and type of symptoms reported during a health scare: A retrospective pre-post observational study. *BMJ Open*. 2012; 2:e001607.
- Webster RK, Weinman J, Rubin GJ. A systematic review of factors that contribute to nocebo effects. *Health Psychol*. 2016;35:1334–1355.
- Faasse K, Grey A, Jordan R, Garland S, Petrie KJ. Seeing is believing: Impact of social modeling on placebo and nocebo responding. *Health Psychol*. 2015;34:880–885.
- Webster RK, Weinman J, Rubin GJ. How does the side-effect information in patient information leaflets influence peoples' side-effect expectations? A cross-sectional national survey of 18- to 65-year-olds in England. *Health Expect*. 2017;20:1411–1420.
- Heller MK, Chapman SC, Horne R. Beliefs about medication predict the misattribution of a common symptom as a

- medication side effect: Evidence from an analogue online study. *J Psychosom Res.* 2015;79:519–529.
28. Parrella A, Gold M, Braunack-Mayer A, Baghurst P, Marshall H. Consumer reporting of adverse events following immunization (AEFI): Identifying predictors of reporting an AEFI. *Hum Vaccin Immunother.* 2014;10:747–754.
  29. Kilgallen I, Gibney MJ. Parental perception of food allergy or intolerance in children under 4 years of age. *J Hum Nutr Diet.* 1996;9:473–478.
  30. Gust DA, Campbell S, Kennedy A, Shui I, Barker L, Schwartz B. Parental concerns and medical-seeking behavior after immunization. *Am J Prev Med.* 2006;31:32–35.
  31. Morris L. *Weekly Headache in Children and Adolescents: Biopsychosocial Correlates and Their Specificity.* Gottingen: Georg-August-Universität zu Göttingen; 2006.
  32. Ramchandani PG, Fazel M, Stein A, Hotopf M. The impact of recurrent abdominal pain: Predictors of outcome in a large population cohort. *Acta Paediatr.* 2007;96:697–701.
  33. Ramchandani PG, Hotopf M, Sandhu B, Stein A; ALSPAC Study Team. The epidemiology of recurrent abdominal pain from 2 to 6 years of age: Results of a large, population-based study. *Pediatrics.* 2005;116:46–50.
  34. Ramchandani PG, Stein A, Hotopf M, Wiles NJ; ALSPAC Study Team. Early parental and child predictors of recurrent abdominal pain at school age: Results of a large population-based study. *J Am Acad Child Adolesc Psychiatry.* 2006;45:729–736.
  35. Aromaa M, Rautava P, Helenius H, Sillanpää ML. Factors of early life as predictors of headache in children at school entry. *Headache.* 1998;38:23–30.
  36. Rocha EM, Prkachin KM, Beaumont SL, Hardy CL, Zumbo BD. Pain reactivity and somatization in kindergarten-age children. *J Pediatr Psychol.* 2003;28:47–57.
  37. Litcher L, Bromet E, Carlson G, et al. Ukrainian application of the Children's Somatization Inventory: Psychometric properties and associations with internalizing symptoms. *J Abnorm Child Psychol.* 2001;29:165–175.
  38. Pitrou I, Shojaei T, Chan-Chee C, Wazana A, Boyd A, Kovess-Masféty V. The associations between headaches and psychopathology: A survey in school children. *Headache.* 2010;50:1537–1548.
  39. Bakoula C, Kapi A, Veltsista A, Kavadias G, Kolaitis G. Prevalence of recurrent complaints of pain among Greek schoolchildren and associated factors: A population-based study. *Acta Paediatr.* 2006;95:947–951.
  40. Grunau RV, Whitfield MF, Petrie JH. Pain sensitivity and temperament in extremely low-birth-weight premature toddlers and preterm and full-term controls. *Pain.* 1994;58:341–346.
  41. Grunau RV, Whitfield MF, Petrie JH, Fryer EL. Early pain experience, child and family factors, as precursors of somatization: A prospective study of extremely premature and full term children. *Pain.* 1994;56:353–359.
  42. Wolff N, Darlington AS, Hunfeld J, et al. Determinants of somatic complaints in 18-month-old children: The generation R study. *J Pediatr Psychol.* 2010;35:306–316.
  43. Haber P, Moro PL, Cano M, Lewis P, Stewart B, Shimabukuro TT. Post-licensure surveillance of quadrivalent live attenuated influenza vaccine United States, Vaccine Adverse Event Reporting System (VAERS), July 2013–June 2014. *Vaccine.* 2015;33:1987–1992.
  44. Rief W, Broadbent E. Explaining medically unexplained symptoms-models and mechanisms. *Clin Psychol Rev.* 2007;27:821–841.
  45. Chen HN, Cohen P, Chen S. How big is a big odds ratio? Interpreting the magnitudes of odds ratios in epidemiological studies. *Commun Stat-Simul C.* 2010;39:860–864.
  46. European Medicines Agency. *Assessment Report. Fluenza Tetra, Common Name: Influenza Vaccine (Live Attenuated, Nasal).* London, UK: European Medicines Agency; 2013.
  47. Rubin GJ, Bakhshi S, Amlot R, et al. The design of a survey questionnaire to measure perceptions and behaviour during an influenza pandemic: The Flu Telephone Survey Template (FluTEST). Southampton, UK, 2014.
  48. Kroenke K, Spitzer RL, Williams JB. The PHQ-15: Validity of a new measure for evaluating the severity of somatic symptoms. *Psychosom Med.* 2002;64:258–266.
  49. Payaprom Y, Bennett P, Alabaster E, Tantipong H. Using the health action process approach and implementation intentions to increase flu vaccine uptake in high risk Thai individuals: A controlled before-after trial. *Health Psychol.* 2011;30:492–500.
  50. Marteau TM, Bekker H. The development of a six-item short-form of the state scale of the Spielberger State-Trait Anxiety Inventory (STAI). *Br J Clin Psychol.* 1992;31 (Pt 3):301–306.
  51. Mackinnon A, Jorm AF, Christensen H, et al. A short form of the positive and negative affect schedule: Evaluation of factorial validity and invariance across demographic variables in a community sample. *Pers Individ Differ.* 1999;27:405–416.
  52. Francis LJ, Brown LB, Philipchalk R. The development of an abbreviated form of the revised Eysenck personality questionnaire (EPQR-A)—its use among students in England, Canada, the USA and Australia. *Pers Individ Differ.* 1992;13:443–449.
  53. Scheier MF, Carver CS, Bridges MW. Distinguishing optimism from neuroticism (and trait anxiety, self-mastery, and self-esteem): A reevaluation of the Life Orientation Test. *J Pers Soc Psychol.* 1994;67:1063–1078.
  54. Petrie KJ, Sivertsen B, Hysing M, et al. Thoroughly modern worries: The relationship of worries about modernity to reported symptoms, health and medical care utilization. *J Psychosom Res.* 2001;51:395–401.
  55. Horne R, Weinman J, Hankins M. The beliefs about medicines questionnaire: The development and evaluation of a new method for assessing the cognitive representation of medication. *Psychol Health.* 1999;14:1–24.
  56. Mackinnon DP. *Mediation in Categorical Data Analysis. Introduction to Statistical Mediation Analysis.* New York, NY: Taylor & Francis Group/Lawrence Erlbaum Associates; 2008.
  57. Dalecki M, Willits FK. Examining change using regression analysis: Three approaches compared. *Sociol Spectr.* 1991;11:127–145.
  58. IBM Corp. *IBM SPSS Statistics for Windows.* Armonk, NY: IBM Corp; 2013.
  59. *StataCorp: Stata Statistical Software: Release 12.* College Station, TX: StataCorp LP; 2011.
  60. Tversky A, Kahneman D. Availability: A heuristic for judging frequency and probability. *Cogn Psychol.* 1973;5:207–232.
  61. Craig KD, Versloot J, Goubert L, Vervoort T, Crombez G. Perceiving pain in others: Automatic and controlled mechanisms. *J Pain.* 2010;11:101–108.
  62. Hatcher JW, Powers LL, Richtsmeier AJ. Parental anxiety and response to symptoms of minor illness in infants. *J Pediatr Psychol.* 1993;18:397–408.
  63. Kolk AM, Hanewald GJ, Schagen S, Gijsbers van Wijk CM. Predicting medically unexplained physical symptoms and health care utilization. A symptom-perception approach. *J Psychosom Res.* 2002;52:35–44.
  64. Bradley BP, Mogg K. Mood and personality in recall of positive and negative information. *Behav Res Ther.* 1994;32:137–141.
